# Supplementary material
Source: publisher figshare collection journal article supplement (https://tandf.figshare.com/articles/dataset/_/19160782)
Supplement: Supplementary file 1 [file 2]

Journal of Vertebrate Paleontology

The cranial anatomy of the long-snouted tyrannosaurid dinosaur *Qianzhousaurus sinensis* from the Late Cretaceous of China

WILLIAM FOSTER ,1* STEPHEN L. BRUSATTE ,1* THOMAS D. CARR ,2 THOMAS E. WILLIAMSON ,3 LAIPING YI ,4  and JUNCHANG LÜ5†

1School of Geosciences, University of Edinburgh, Grant Institute, James Hutton Road, Edinburgh, EH9 3FE, United Kingdom, william.foster.eng@gmail.com, [Stephen.Brusatte@ed.ac.uk](mailto:Stephen.Brusatte@ed.ac.uk);

2Department of Biology, Carthage College, 2001 Alford Park Drive, Kenosha, WI 53140, USA, tcarr@carthage.edu;

3New Mexico Museum of Natural History and Science, Albuquerque, New Mexico, 87104, USA, Thomas.Williamson@state.nm.us;

4Ganzhou Museum, Ganzhou 341000, Jiangxi Province, China;

5Institute of Geology, Chinese Academy of, Geological Sciences, Beijing, China

†Deceased

*Corresponding author


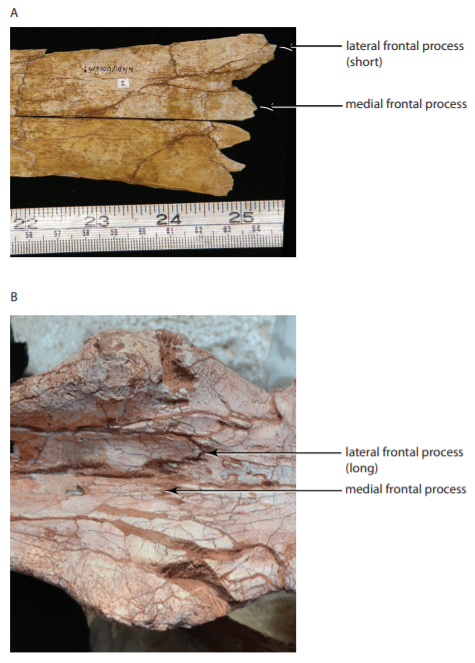


FIGURE S1. The frontal process of the nasals in dorsal view of the holotype specimens of *Alioramus altai* (A) and *Qianzhousaurus sinensis* (B), showing the difference in length of the lateral frontal process relative to the medial frontal process. Although the tip is damaged, the lateral process in *A. altai* was only slightly longer than the medial process, whereas in *Q. sinensis* the lateral process is at least twice as long as the medial process.
